# Supplementary material for: Inappropriate cathepsin K secretion promotes its enzymatic activation driving heart and valve malformation
Source: PubMed Central journal article supplement (PMC7605527; doi:10.1172/jci.insight.133019), 2020-10-15
Supplement: jciinsight-5-133019-s021.pdf [file jciinsight-5-133019-s021.pdf]

**A** Table of F0 founder animals outcomes

| Line  | Female | Male | Concentration<br>Tale mRNA (pg) | Genetic<br>Mutation        | % F1 outcross progeny<br>with Mutation |
|-------|--------|------|---------------------------------|----------------------------|----------------------------------------|
| 1     | F      |      | 0.5 pg                          | 5bp del                    | 11/46                                  |
| 3*    | F      |      | 0.5 pg                          | 2bp del                    | 14/14                                  |
| 5     | F      |      | 0.5 pg                          | 1bp del                    | 1/20                                   |
| 6     | F      |      | 0.5 pg                          | 25bp ins; 8bp del          | 18/20                                  |
| 8     | F      |      | 0.5 pg                          | 5bp ins; 6bp del           | 15/20                                  |
| 10    | F      |      | 0.3 pg                          | 8bp del                    | 4/20                                   |
| 14    | F      |      | 0.3 pg                          | 7bp del                    | 2/20                                   |
| 19    | F      |      | 0.3 pg                          | 4bp ins; 3bp ins           | 9/20                                   |
| ----- |        |      |                                 |                            |                                        |
| 1     |        | M    | 0.5 pg                          | 5bp del; 8bp del           | 2/11                                   |
| 2*    |        | M    | 0.5 pg                          | 5bp del                    | 17/20                                  |
| 3*    |        | M    | 0.5 pg                          | 2bp del; 7bp del           | 13/13                                  |
| 5     |        | M    | 0.5 pg                          | 4bp del; 5bp del           | 7/14                                   |
| 6     |        | M    | 0.5 pg                          | 5bp del; 8bp del; 10bp ins | 6/15                                   |
| 9     |        | M    | 0.5 pg                          | 1bp del                    | 2/20                                   |
| 10    |        | M    | 0.5 pg                          | 1bp ins                    | 4/20                                   |
| 13    |        | M    | 0.3 pg                          | 6bp del                    | 10/21                                  |
| 14    |        | M    | 0.3 pg                          | 5bp del; 7bp del           | 5/20                                   |

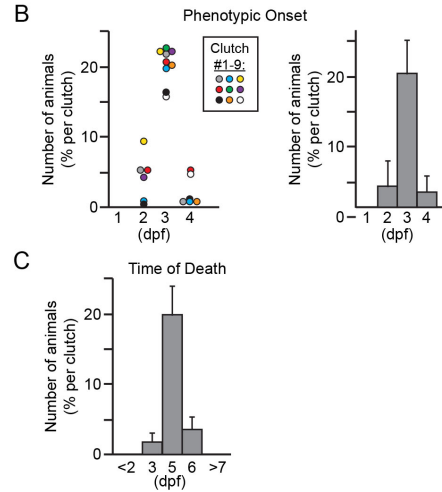

**D** Table of primers used for RT-PCR analyses and genotyping

| Primer Name        | Primer Sequence                                                  | Gene Location        | Experimental Use                         |
|--------------------|------------------------------------------------------------------|----------------------|------------------------------------------|
| <i>gnptab</i> TALE | For: TATGCGGCATATCAGACTTGA<br>Rev: CTTCAATTCACAACATCCCAT         | Intron 7 to Intron 8 | RFLP genotyping                          |
| <i>gnptab</i> TALE | For: AATGGAGTCGAGATCAGTACCA<br>Rev: TCAACCACTCACCTCGTCTG         | Ex2 to Intron2       | HRM genotyping                           |
| <i>gnptab</i>      | For: TATGCGGCATATCAGACTTGA<br>Rev: CTTCAATTCACAACATCCCAT         | Ex7 to Ex8           | RT-PCR and Sequencing                    |
| <i>ctsk</i> TALE   | For: ATGAATTCTAACAAATTTGCCGTGC<br>Rev: AACTTGGGTGAGTTTGTAACAATAC | Ex3 to Ex3           | RFLP genotyping                          |
| <i>ctsk</i>        | For: GGATCAGCAGTGTGCCTACA<br>Rev: TGGACTGCATGGCATCTATG           | Ex4-5 to Ex5         | Traditional PCR genotyping               |
| <i>cmlc2</i>       | For: GGAGAGAAGCTCAATGGCACA<br>Rev: GGGTCATTAGCAGCCTCTTG          | Ex4-5 to Ex6         | Quantitative and Non-Quantitative RT-PCR |
| <i>ctsla</i>       | For: GGAGGGTCAGATGTTTCAGGA<br>Rev: CAGTCCACCAGTTCTGCTC           | Ex5 to Ex5           | Quantitative and Non-Quantitative RT-PCR |
| <i>ctss1</i>       | For: ACTGCACTGGCTTCAGGATT<br>Rev: GCCCGATGTTAGCGACAG             | Ex6 to Ex6           | Quantitative and Non-Quantitative RT-PCR |
| <i>tie2</i>        | For: AGCACACTCTCCTCACAGCA<br>Rev: TTCGCCACAAAGTTCTCTCC           | Ex17-Ex18            | Quantitative and Non-Quantitative RT-PCR |
| <i>rp14</i>        | For: GTGCCCGACCGTTAATCTC<br>Rev: ACACTGCTGGCATAACCACAT           | Ex2 to Ex2           | Quantitative and Non-Quantitative RT-PCR |

**Supplemental Figure 1.** A) Table illustrating the outcomes of F0 founder analyses. 20 males and 20 females were screened following injection of indicated TALEN concentrations. Shown are animals with interesting insertions and deletions following sequence analyses. The genetic mutations detected and the number of offspring from outcross matings with TLAB carrying the mutation listed. F1 outcrossed lines were generated from female 3 and males 2 and 3. B) Graph illustrates timing of phenotypic onset as scored from 9 distinct clutches. Circles represent individual clutches and indicate the number of embryos in the clutch (y axis) and time of phenotypic onset (x axis). This is also shown in the accompanying bar graph. C) Graph illustrates time of death for embryos in these phenotypically scored clutches. D) List of primers used in the study.

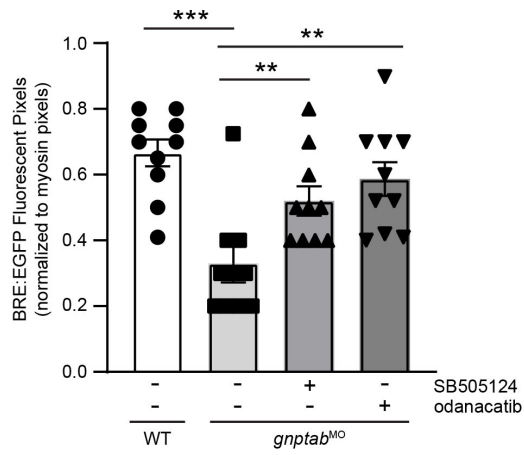

**Supplemental Figure 2.** BMP signaling is reduced in the hearts of *gnptab*-deficient MLII embryos. A) Graphs represent quantitation of BMP signaling, as assessed using BRE:EGFP transgenic zebrafish. EGFP fluorescence was calculated in the right half of the ventricle. EGFP fluorescence was normalized to fluorescent units for myosin staining within the same region.

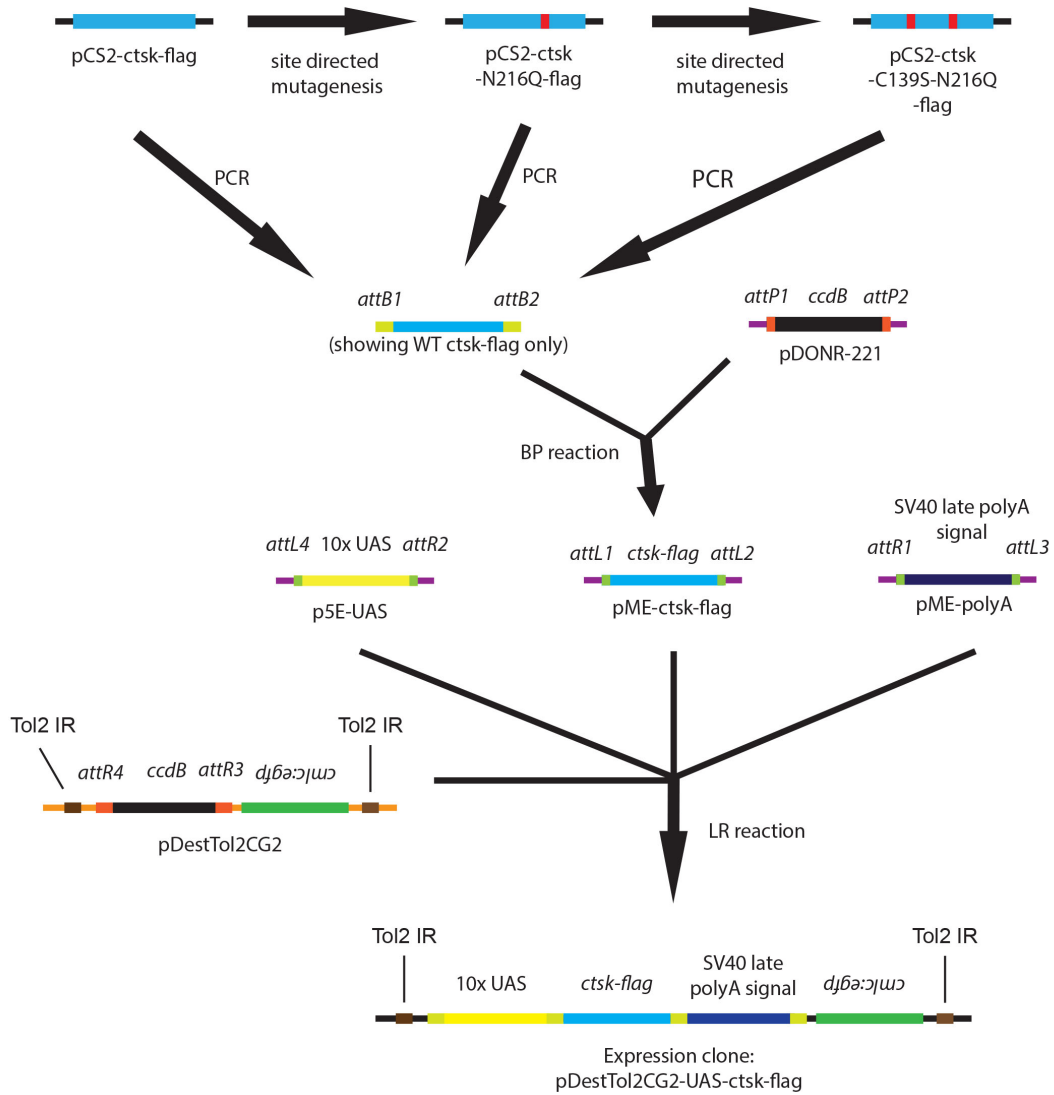

**Supplemental Figure 3.** Schematic illustrating generation of TOL2 constructs to create transgenic zebrafish lines expressing WT, N216Q, and N216Q;C139S forms of cathepsin K under the control of UAS.

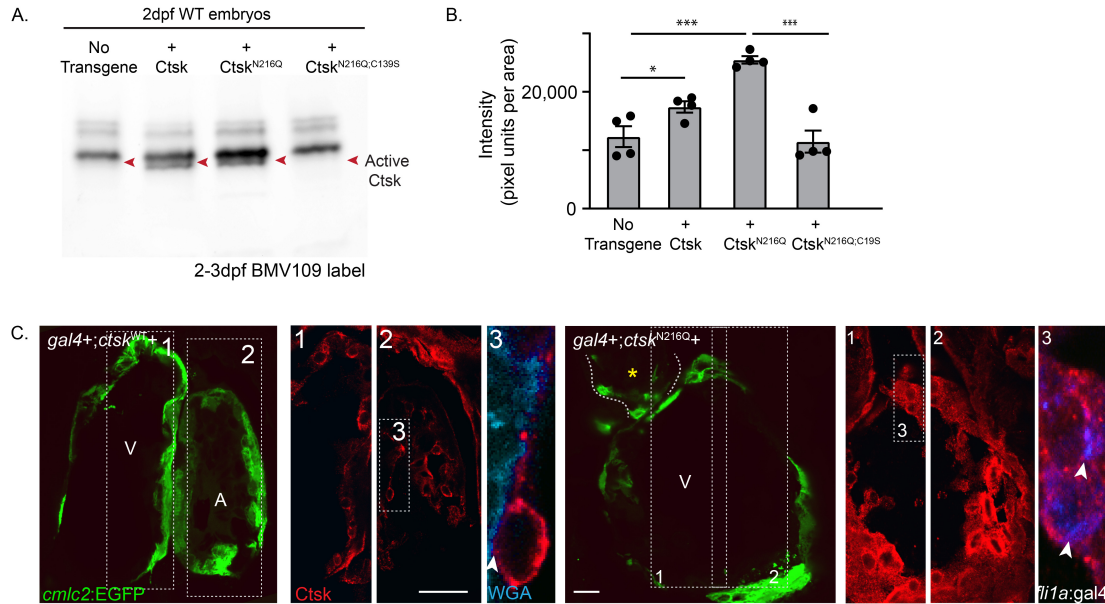

**Supplemental Figure 4.** A) BMV109 labeling of all transgenic conditions show Ctsk activity is increased in the Ctsk<sup>N216Q</sup> variant but completely lost in the Ctsk<sup>C139S;N216Q</sup>, suggesting the variant is indeed catalytically dead. Representative gel from 4 independent experiments. B) Densitometric quantitation of Ctsk activity in 4 experiments. All measurements normalized to total protein load as assayed by Coomassie stain following gel imaging. C) Enlarged images from from Figure 7D showing the N216Q Ctsk variant is secreted from endothelial cells (see white arrows, panels 3). This is demonstrated by overlap with WGA (blue), which labels glycans at the cell surface and in the extracellular space. This is in contrast to WT Ctsk which is clearly distinct from extracellular WGA. Scale bars=20 $\mu$ m.
